# Supplementary material for: Weak Cross-Lineage Neutralization by Anti SARS-CoV-2 Spike Antibodies after Natural Infection or Vaccination Is Rescued by Repeated Immunological Stimulation
Source: MDPI journal article supplement (doi:10.3390/vaccines9101124), 2021-10-02
Supplement: s1 [file s1]

| Serum ID                                  | Date of serum collection | Sex | Age | Date of SARS-CoV-2 infection | Infection with lineages | Date of vaccination | Reciprocal plasma dilution values |         |       |         |         |           | Anti-nucleocapsid IgG tot | Anti-spike IgG II BAU/ml |         |
|-------------------------------------------|--------------------------|-----|-----|------------------------------|-------------------------|---------------------|-----------------------------------|---------|-------|---------|---------|-----------|---------------------------|--------------------------|---------|
|                                           |                          |     |     |                              |                         |                     | B.1                               | B.1.1.7 | P.1   | B.1.526 | R.1.351 | R.1.447.2 |                           |                          |         |
| kern receiving BNT162b2 vaccine (I dose)  |                          |     |     |                              |                         |                     |                                   |         |       |         |         |           |                           |                          |         |
| 30850                                     | 02/02/2021               | F   | 33  |                              |                         | 12/01/2021          | 453                               | 345     | 26    | <20     | <20     | <20       | Non reactive              | 374.48                   |         |
| 77165                                     | 02/02/2021               | F   | 31  |                              |                         | 12/01/2021          | 12                                | <20     | 12    | <20     | <20     | <20       | Non reactive              | 281.78                   |         |
| 34284                                     | 04/02/2021               | F   | 60  |                              |                         | 14/01/2021          | 29                                | <20     | <20   | <20     | <20     | <20       | Non reactive              | 248.41                   |         |
| 77475                                     | 02/02/2021               | F   | 24  |                              |                         | 12/01/2021          | 45                                | 113     | 71    | <20     | <20     | <20       | Non reactive              | 221.53                   |         |
| 72796                                     | 26/01/2021               | F   | 67  |                              |                         | 05/01/2021          | 26                                | <20     | <20   | <20     | <20     | <20       | Non reactive              | 178.97                   |         |
| 79330                                     | 26/01/2021               | F   | 39  |                              |                         | 05/01/2021          | 14                                | <20     | <20   | <20     | <20     | <20       | Non reactive              | 167.54                   |         |
| 78562                                     | 28/01/2021               | F   | 40  |                              |                         | 07/01/2021          | 37                                | <20     | <20   | <20     | <20     | <20       | Non reactive              | 126.87                   |         |
| 31249                                     | 31/01/2021               | M   | 40  |                              |                         | 10/01/2021          | <20                               | <20     | <20   | <20     | <20     | <20       | Non reactive              | 124.8                    |         |
| 21380                                     | 01/02/2021               | F   | 57  |                              |                         | 11/01/2021          | <20                               | <20     | <20   | <20     | <20     | <20       | Non reactive              | 117.83                   |         |
| 11112                                     | 28/01/2021               | M   | 56  |                              |                         | 07/01/2021          | 112                               | <20     | 12    | <20     | <20     | <20       | Non reactive              | 104.66                   |         |
| 57847                                     | 04/02/2021               | F   | 55  | 28/02/2020                   | unknown                 | 14/01/2021          | 194                               | 594     | 384   | 139     | 96      | 139       | Reactive                  | 1808.78                  |         |
| 23919                                     | 03/02/2021               | F   | 32  | 03/11/2020                   | unknown                 | 13/01/2021          | >1280                             | 689     | 384   | 457     | 113     | 267       | Reactive                  | 2560.69                  |         |
| 75818                                     | 05/02/2021               | F   | 32  | 15/10/2020                   | unknown                 | 15/01/2021          | 2153                              | 877     | 594   | 381     | 172     | 206       | Reactive                  | 2668.90                  |         |
| kern receiving BNT162b2 vaccine (II dose) |                          |     |     |                              |                         |                     |                                   |         |       |         |         |           |                           |                          |         |
| 42463                                     | 17/02/2021               | F   | 50  |                              |                         | 13/01/2021          | 99                                | 57      | 261   | 9       | <20     | 11        | Non reactive              | 784.96                   |         |
| 34764                                     | 11/02/2021               | F   | 54  |                              |                         | 07/01/2021          | 113                               | 42      | 67    | 36      | <20     | 12        | Non reactive              | 769.27                   |         |
| 35037                                     | 10/02/2021               | F   | 55  |                              |                         | 05/01/2021          | 113                               | 48      | 172   | 43      | <20     | 8         | Non reactive              | 863.06                   |         |
| 42966                                     | 15/02/2021               | F   | 57  |                              |                         | 11/01/2021          | 192                               | 74      | 172   | 64      | <20     | 21        | Non reactive              | 1960.35                  |         |
| 42043                                     | 17/02/2021               | M   | 40  |                              |                         | 10/01/2021          | 113                               | 34      | 88    | 52      | <20     | 26        | Non reactive              | 827.91                   |         |
| 36868                                     | 11/02/2021               | F   | 40  |                              |                         | 07/01/2021          | 533                               | 297     | 533   | 82      | 14      | 88        | Non reactive              | 3651.43                  |         |
| 41772                                     | 09/02/2021               | F   | 67  |                              |                         | 05/01/2021          | 345                               | 149     | 345   | 94      | 28      | 33        | Non reactive              | 1318.71                  |         |
| 33066                                     | 12/02/2021               | F   | 56  |                              |                         | 05/01/2021          | 351                               | 149     | 160   | 56      | <20     | 71        | Non reactive              | 990.32                   |         |
| 41822                                     | 18/02/2021               | F   | 33  |                              |                         | 12/01/2021          | 640                               | 345     | 533   | 80      | <20     | 53        | Non reactive              | 2709.84                  |         |
| 40717                                     | 09/02/2021               | F   | 39  |                              |                         | 05/01/2021          | 987                               | 258     | 987   | 452     | 37      | 94        | Non reactive              | 3743.53                  |         |
| 42384                                     | 18/02/2021               | F   | 60  |                              |                         | 14/01/2021          | 533                               | 301     | 604   | 359     | 14      | 67        | Non reactive              | 4397.14                  |         |
| 34302                                     | 12/02/2021               | F   | 59  |                              |                         | 09/01/2021          | 987                               | 297     | 521   | 292     | 43      | 297       | Non reactive              | 5384.69                  |         |
| 38174                                     | 22/02/2021               | F   | 46  |                              |                         | 18/01/2021          | 226                               | 113     | 160   | 79      | <20     | 9         | Non reactive              | 4309.65                  |         |
| 57977                                     | 18/02/2021               | M   | 31  |                              |                         | 14/01/2021          | 172                               | 74      | 37    | 111     | <20     | 96        | Non reactive              | 1884.63                  |         |
| 5217                                      | 19/02/2021               | F   | 52  |                              |                         | 15/01/2021          | 113                               | 384     | 113   | 86      | 144     | <20       | 47                        | Non reactive             | 1225.19 |
| 57924                                     | 18/02/2021               | M   | 63  |                              |                         | 14/01/2021          | 172                               | 74      | 34    | 33      | <20     | 28        | Non reactive              | 1024.13                  |         |
| 33589                                     | 19/02/2021               | F   | 61  |                              |                         | 15/01/2021          | 436                               | 43      | 12    | 43      | <20     | 74        | Non reactive              | 4742.23                  |         |
| 57482                                     | 15/02/2021               | M   | 32  |                              |                         | 13/01/2021          | 594                               | 172     | 67    | 175     | 28      | 44        | Non reactive              | 2154.38                  |         |
| 37497                                     | 10/03/2021               | F   | 55  |                              |                         | 13/01/2021          | 113                               | 26      | <20   | 57      | <20     | 20        | Non reactive              | 574.57                   |         |
| 57711                                     | 15/02/2021               | F   | 50  |                              |                         | 12/01/2021          | 149                               | 12      | 26    | 105     | <20     | 10        | Non reactive              | 3901.11                  |         |
| 57530                                     | 16/02/2021               | M   | 51  |                              |                         | 12/01/2021          | 149                               | 34      | 26    | 40      | <20     | 20        | Non reactive              | 747.18                   |         |
| 33382                                     | 19/02/2021               | F   | 52  |                              |                         | 14/01/2021          | 594                               | 226     | 172   | 278     | 14      | 82        | Non reactive              | 3722.31                  |         |
| 50748                                     | 15/03/2021               | M   | 59  |                              |                         | 10/01/2021          | 689                               | 538     | 345   | 345     | 48      | 53        | Non reactive              | 4344.83                  |         |
| 59047                                     | 02/03/2021               | F   | 45  |                              |                         | 15/01/2021          | 905                               | 226     | 149   | 94      | 37      | 80        | Non reactive              | 2171.59                  |         |
| 36864                                     | 17/02/2021               | F   | 24  |                              |                         | 12/01/2021          | 453                               | 226     | 267   | 265     | 86      | 26        | Non reactive              | 3128.87                  |         |
| 36831                                     | 16/02/2021               | F   | 26  |                              |                         | 12/01/2021          | 351                               | 113     | 96    | 86      | <20     | 26        | Non reactive              | 2703.38                  |         |
| 45394                                     | 12/02/2021               | M   | 56  |                              |                         | 07/01/2021          | 86                                | 57      | 42    | 43      | <20     | 26        | Non reactive              | 1647.15                  |         |
| 36841                                     | 16/02/2021               | F   | 31  |                              |                         | 12/01/2021          | 464                               | 297     | 172   | 202     | 57      | 27        | Non reactive              | 10447.36                 |         |
| 76252                                     | 15/02/2021               | F   | 61  | 14/12/2020                   | unknown                 | 11/01/2021          | 297                               | 86      | 34    | 58      | <20     | 22        | Non reactive              | 2137.31                  |         |
| 33595                                     | 19/02/2021               | F   | 54  |                              |                         | 15/01/2021          | 453                               | 258     | 113   | 110     | 43      | 113       | Non reactive              | 2801.34                  |         |
| 43451                                     | 17/02/2021               | F   | 36  |                              |                         | 13/01/2021          | 226                               | 57      | 86    | 74      | 37      | 12        | Non reactive              | 2823                     |         |
| 43889                                     | 18/02/2021               | F   | 60  |                              |                         | 13/01/2021          | 384                               | 113     | 86    | 345     | 34      | 48        | Non reactive              | 3273.35                  |         |
| 44681                                     | 19/02/2021               | F   | 49  |                              |                         | 15/01/2021          | 267                               | 43      | 37    | 38      | <20     | 25        | Non reactive              | 919.71                   |         |
| 43595                                     | 18/02/2021               | F   | 43  |                              |                         | 12/01/2021          | 345                               | 113     | 86    | 87      | <20     | 26        | Non reactive              | 2382.22                  |         |
| 43918                                     | 18/02/2021               | F   | 44  | 28/02/2020                   | unknown                 | 14/01/2021          | 453                               | 86      | 48    | 227     | <20     | 37        | Non reactive              | 2280.42                  |         |
| 44494                                     | 19/02/2021               | M   | 49  |                              |                         | 14/01/2021          | 192                               | 57      | 47    | 48      | <20     | 18        | Non reactive              | 1984                     |         |
| 43775                                     | 18/02/2021               | F   | 39  |                              |                         | 13/01/2021          | 689                               | 172     | 86    | 115     | <20     | 113       | Non reactive              | 1938.41                  |         |
| 44456                                     | 19/02/2021               | F   | 35  |                              |                         | 15/01/2021          | 198                               | 43      | 37    | 42      | <20     | 49        | Non reactive              | 1207.24                  |         |
| 42364                                     | 17/02/2021               | F   | 53  |                              |                         | 13/01/2021          | 147                               | 17      | <20   | 17      | <20     | 67        | Non reactive              | 4397.14                  |         |
| 43752                                     | 18/02/2021               | F   | 58  |                              |                         | 12/01/2021          | 905                               | 351     | 113   | 363     | 43      | 137       | Non reactive              | 4251.59                  |         |
| 50588                                     | 18/03/2021               | M   | 56  |                              |                         | 11/02/2021          | 594                               | 453     | 113   | 179     | 34      | 90        | Non reactive              | 4651.52                  |         |
| 59751                                     | 19/03/2021               | M   | 58  |                              |                         | 11/02/2021          | 184                               | 172     | 86    | 148     | 26      | 44        | Non reactive              | 3998.62                  |         |
| 49535                                     | 18/03/2021               | F   | 50  |                              |                         | 11/02/2021          | 2153                              | 297     | 172   | 976     | 34      | 269       | Non reactive              | 5483.18                  |         |
| 49590                                     | 18/03/2021               | F   | 49  |                              |                         | 10/02/2021          | 226                               | 43      | 26    | 57      | <20     | 26        | Non reactive              | 1901.87                  |         |
| 49592                                     | 18/03/2021               | M   | 28  |                              |                         | 11/02/2021          | 384                               | 172     | 113   | 96      | 37      | 20        | Non reactive              | 5124.96                  |         |
| 50005                                     | 18/03/2021               | F   | 42  |                              |                         | 11/02/2021          | 761                               | 453     | 521   | 290     | 74      | 88        | Non reactive              | 5503.89                  |         |
| 44351                                     | 18/03/2021               | M   | 50  |                              |                         | 11/02/2021          | 2153                              | 172     | 297   | 353     | 74      | 160       | Non reactive              | 5041.56                  |         |
| 36631                                     | 18/03/2021               | F   | 56  |                              |                         | 11/02/2021          | 2153                              | 94      | 226   | 707     | 86      | 353       | Non reactive              | 5274.05                  |         |
| 41757                                     | 23/02/2021               | M   | 59  |                              |                         | 16/01/2021          | 689                               | 453     | 297   | 479     | 74      | 227       | Non reactive              | 3618.98                  |         |
| 57493                                     | 02/03/2021               | F   | 36  |                              |                         | 16/01/2021          | 43                                | 12      | <20   | 9       | <20     | 12        | Non reactive              | 628.23                   |         |
| 57848                                     | 23/02/2021               | F   | 55  | 28/02/2020                   | unknown                 | 14/01/2021          | >1280                             | 761     | 689   | 594     | 149     | 689       | Reactive                  | 2561.52                  |         |
| 42090                                     | 19/02/2021               | F   | 32  | 03/11/2020                   | unknown                 | 13/01/2021          | 2153                              | 594     | 453   | 190     | 113     | 587       | Reactive                  | 3143.22                  |         |
| 44588                                     | 19/02/2021               | F   | 32  | 15/10/2020                   | unknown                 | 15/01/2021          | >1280                             | 1076    | >1280 | 594     | 248     | 689       | Reactive                  | 4906.46                  |         |
| 49531                                     | 18/03/2021               | F   | 50  |                              |                         | 11/02/2021          | 2153                              | 2153    | 2153  | 538     | 453     | 538       | Reactive                  | 4778.1                   |         |
| 41765                                     | 23/02/2021               | F   | 55  | 27/10/2020                   | unknown                 | 16/01/2021          | >1280                             | 1522    | 570   | 594     | 176     | 345       | Reactive                  | 3638.96                  |         |
| 45170                                     | 25/02/2021               | F   | 31  | 28/02/2020                   | unknown                 | 04/01/2021          | 2153                              | 1522    | 453   | 294     | 113     | 453       | Reactive                  | 2578.76                  |         |
| 49351                                     | 24/02/2021               | F   | 40  | 01/12/2020                   | unknown                 | 15/01/2021          | 533                               | 297     | 533   | 297     | 43      | 76        | Reactive                  | 3501.08                  |         |
| 36231                                     | 10/03/2021               | M   | 59  | 24/10/2020                   | unknown                 | 13/01/2021          | >1280                             | 987     | 1522  | 453     | 172     | 594       | Reactive                  | 2637.38                  |         |
| 45203                                     | 25/02/2021               | F   | 25  | 28/02/2020                   | unknown                 | 16/01/2021          | >1280                             | 2153    | 987   | 810     | 594     | 761       | Reactive                  | 4906.65                  |         |
| 39885                                     | 23/02/2021               | F   | 42  | 23/02/2020                   | unknown                 | 12/01/2021          | 594                               | 538     | 538   | 345     | 421     | 421       | Reactive                  | 2546.13                  |         |
| 41741                                     | 23/02/2021               | F   | 55  | 04/04/2020                   | unknown                 | 16/01/2021          | >1280                             | 2153    | 761   | 986     | 226     | 380       | Reactive                  | 2198.4                   |         |
| 44042                                     | 24/02/2021               | F   | 42  | 12/11/2020                   | unknown                 | 08/01/2021          | 2153                              | 384     | 229   | 302     | 37      | 149       | Reactive                  | 1899.23                  |         |
| 44525                                     | 24/02/2021               | M   | 32  | 24/02/2020                   | unknown                 | 07/01/2021          | 805                               | 564     | 345   | 384     | 137     | 895       | Reactive                  | 2304.8                   |         |
| 48548                                     | 26/02/2021               | M   | 51  | 21/10/2020                   | unknown                 | 21/01/2021          | 2153                              | 689     | 384   | 922     | 113     | 250       | Reactive                  | 2762.14                  |         |
| 45341                                     | 25/02/2021               | F   | 48  | 05/10/2020                   | unknown                 | 10/01/2021          | >1280                             | >1280   | 594</ |         |         |           |                           |                          |         |
